# Supplementary material for: Brief communication: Towards disability inclusive risk management
Source: Copernicus journal article supplement (doi:10.5194/nhess-26-703-2026), 2026-01-30
Supplement: Supplementary file 1 [file nhess-26-703-2026-supplement.pdf]

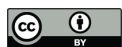

*Supplement of*

## **Brief communication: Towards disability inclusive risk management**

**Vesna Coutureau et al.**

*Correspondence to:* Tabea Bork-Hüffer (tabea.bork-hueffer@uni-heidelberg.de)

The copyright of individual parts of the supplement might differ from the article licence.

## Section S1: Codes used for the qualitative analysis

Table S1: Codes used for the qualitative analysis

| Supercategory        | Subcategory                                                                                       | Deductive / Inductive |
|----------------------|---------------------------------------------------------------------------------------------------|-----------------------|
| Inclusive practices  | Cooperation between authorities with security tasks and organizations of people with disabilities | Deductive             |
|                      | Laws and guidelines for the consideration of people with disabilities                             | Inductive             |
|                      | Exercises and training to take people with disabilities into account                              | Inductive             |
|                      | Evacuation                                                                                        | Inductive             |
| Inclusive structures | Barriers in disaster management                                                                   | Deductive             |
|                      | Existing measures to reduce barriers                                                              | Inductive             |
|                      | Representation in disaster management                                                             | Deductive             |
|                      | Opportunities for co-design in disaster management                                                | Deductive             |
|                      | Data on needs and capabilities                                                                    | Deductive             |
|                      | Self-help and necessary structures                                                                | Inductive             |
|                      | Neighborhood help                                                                                 | Inductive             |
| Inclusive cultures   | Reference to people with disabilities                                                             | Deductive             |
|                      | Understanding of disability                                                                       | Deductive             |
|                      | Question of value                                                                                 | Inductive             |
| Other                | Awareness and sensitization to disasters                                                          | Inductive             |

## Section S2: Exemplary semi-structured interview guide

This is an exemplary guide that has in practice been adapted to the respective expert interview partners.

Introduction:

- Welcome! Thank you for your time.
- I am trying to find out to what extent people with disabilities are taken into account in disaster situations and what challenges and barriers still exist today.
- May I audio record the interview?

General questions:

- Are people able to evacuate themselves in the event of flooding?

- Have you ever experienced difficulties in taking people with disabilities into account in disasters?
- In your opinion, are your employees adequately trained?
- Do you also practise a possible evacuation with your clients?

#### Collaboration:

- What has your experience been working with disaster management authorities on developing inclusive disaster management measures?
  - o What recommendations do you have for more effective cooperation between disability organisations and disaster management authorities?
- Do you know of any opportunities to get involved in the development and decision-making processes for disaster management measures?
  - o Are you participating in the Tyrolean Action Plan?

#### Awareness:

- How could awareness of the requirements of people with disabilities be raised in the civil protection sector?
- What training measures could be implemented to improve sensitivity and understanding of the requirements of people with disabilities in context of disasters?

#### Inclusive disaster risk management:

- What do you understand by inclusive disaster management?
  - o What does it encompass?
- Where do you see your contribution to inclusive disaster management?
- What do you think stands in the way of inclusive disaster management?

#### Conclusion:

- Is there anything else that is important to you that has not yet been mentioned?
- Thank you very much for your time!
